# Supplementary material for: Enhanced luminol chemiluminescence by Co–Fe LDH nanoplates and its application in H2O2 and glucose detection
Source: Royal Society of Chemistry journal article supplement (doi:10.1039/c6ay02731h), 2017-01-01
Supplement: c6ay02731h1.pdf [file c6ay02731h1.pdf]

## **Electronic Supplementary Information(ESI) for**

Enhanced luminol chemiluminescence by Co-Fe  
LDH nanoplates and its application in H<sub>2</sub>O<sub>2</sub> and  
glucose detection

**Jianxin Xie,<sup>a,\*</sup> Wenjing Chen,<sup>a</sup> Xianxue Wu,<sup>a</sup> Yunying Wu,<sup>a</sup> Hong  
Lin,<sup>a</sup>**

<sup>a</sup>College of Resources and Environment, Yuxi Normal University, Yuxi, Yunnan  
653100, P. R. China

---

\* To whom correspondence should be addressed. E-mail: xjx11228@163.com, Tel.: +86 -877-2052169

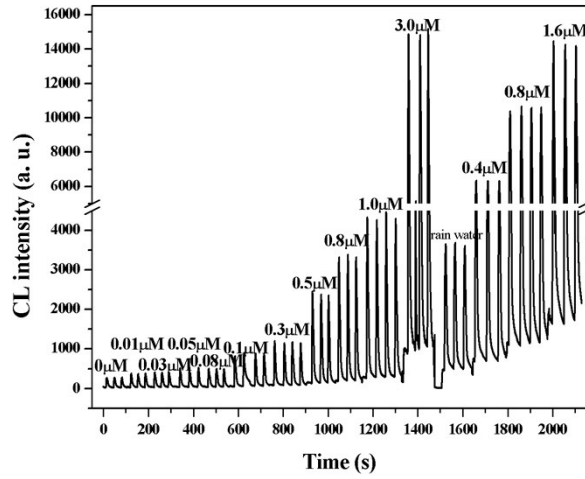

Fig. S1 The analytical record of the  $\text{H}_2\text{O}_2$  standard curve and rain water sample determination

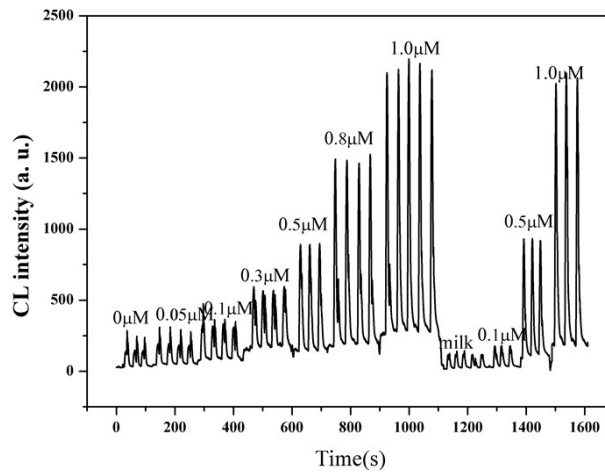

Fig. S2 The analytical record of the  $\text{H}_2\text{O}_2$  detection in milk water sample and the spiked recovery

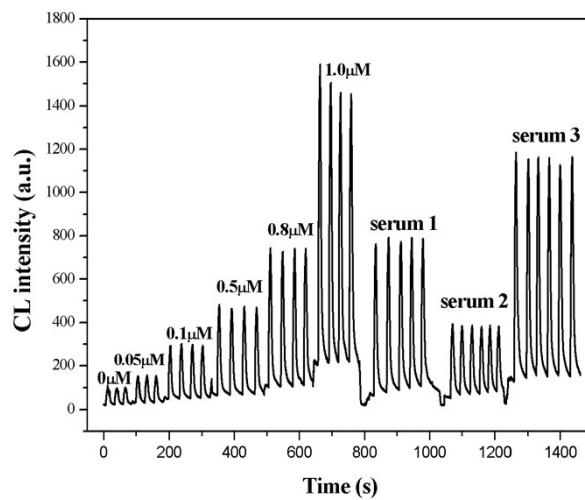

Fig. S3 The analytical record of the glucose detection in serum sample
